# Supplementary material
Source: MDPI journal article supplement (https://www.mdpi.com/2073-4344/13/5/896)
Supplement: s1 [file s1]

# Support Effect of Ga-Based Catalysts in the CO<sub>2</sub>-Assisted Oxidative Dehydrogenation of Propane

Wei Zhou <sup>1,\*†</sup>, Yulin Jiang <sup>2,†</sup>, Zhiguo Sun <sup>3</sup>, Shiqi Zhou <sup>2</sup>, Erpai Xing <sup>2</sup>, Yang Hai <sup>2</sup>, Guanghao Chen <sup>2</sup>  
and Yuetong Zhao <sup>2</sup>

<sup>1</sup> Center Tech Tianjin Chemical Research and Design Institute Co., Ltd., Tianjin 300131, China;

<sup>2</sup> Department of Catalytic Chemistry and Engineering, State Key Laboratory of Fine Chemicals, Dalian University of Technology, Dalian 116024, China;  
jyulin@mail.dlut.edu.cn (Y.J.); 505888223@mail.dlut.edu.cn (S.Z.);  
1499783907@mail.dlut.edu.cn (E.X.); hy13897470638@163.com (Y.H.);  
arsenic1218@163.com ([G.C.](mailto:G.C.15841708066@mail.dlut.edu.cn));15841708066@mail.dlut.edu.cn (Z.Y.)

<sup>3</sup> Petrochemical Research Institute, PetroChina, Beijing 102206, China;  
sunzhiguo1@petrochina.com.cn

\* Correspondence: 362200922@163.com

† These authors contributed equally to this work.

## Content

|                 |    |
|-----------------|----|
| Figure S1 ..... | S2 |
| Figure S2 ..... | S2 |
| Figure S3 ..... | S3 |
| Figure S4.....  | S4 |
| Figure S5.....  | S4 |
| Figure S6.....  | S5 |
| Figure S7.....  | S5 |
| Table S1.....   | S3 |
| Table S2.....   | S3 |

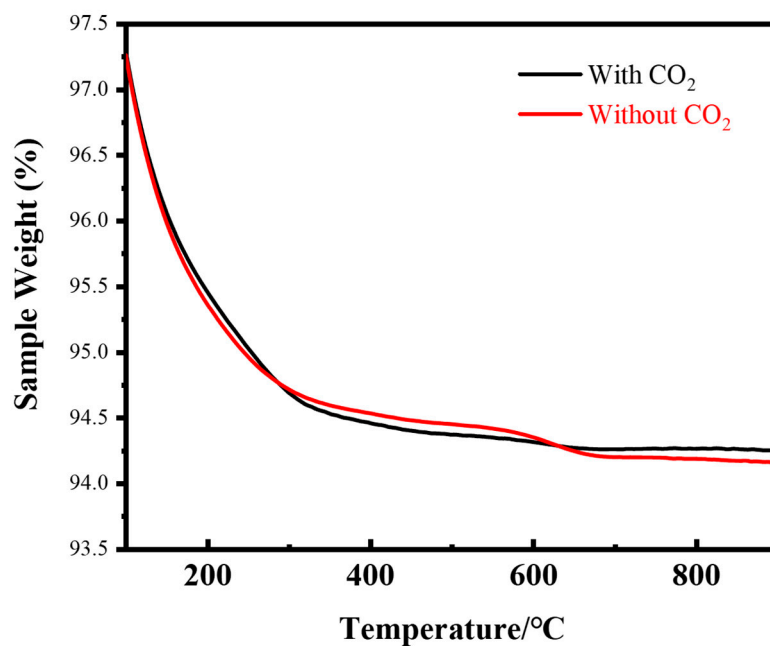

**Figure S1.** TGA profiles for spent Ga/ZSM-5(28) after ODHP in the presence and absence of CO<sub>2</sub> under air condition from 100°C to 900°C.

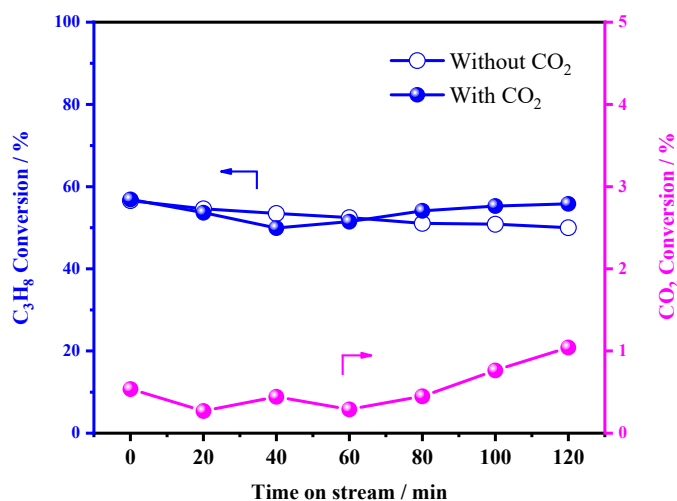

**Figure S2.** The performance over Ga/ZSM-5 (28) in the ODHP reaction with and without CO<sub>2</sub>. Reaction conditions:  $m_{\text{cat}} = 0.5\text{g}$ ,  $T = 600\text{ }^{\circ}\text{C}$ ,  $P = 0.1\text{ MPa}$ ,  $\text{GHSV} = 7200\text{ mL g}_{\text{cat}}^{-1}\text{ h}^{-1}$ ,  $\text{CO}_2:\text{C}_3\text{H}_8:\text{N}_2 = 1:1:18$ .

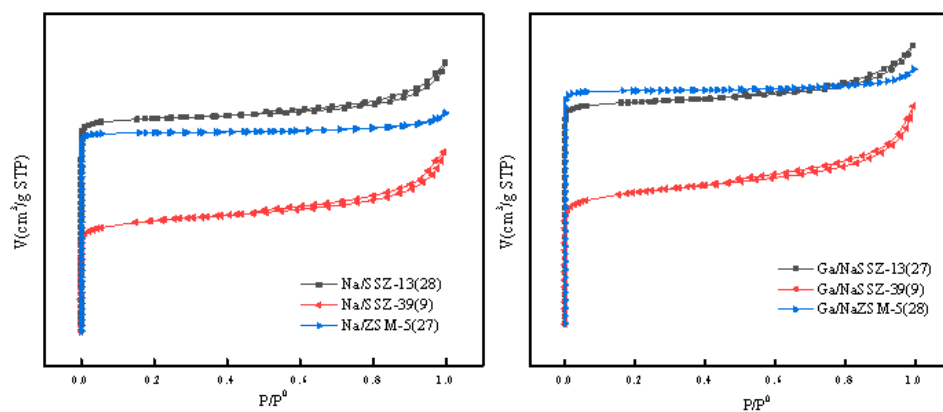

**Figure S3.** The adsorption isotherm of the pure and Ga-modified zeolite samples

**Table S1.** ICP-OES measurements of the Ga-based catalysts before and after the reaction.

| Zeolite       | Ga Loading (%)  |                |
|---------------|-----------------|----------------|
|               | Before reaction | After reaction |
| Ga/SSZ-13(27) | 0.22%           | 0.17%          |
| Ga/SSZ-39(9)  | 0.23%           | 0.15%          |
| Ga/ZSM-5(28)  | 0.22%           | 0.11%          |

**Table S2.** Relative acid strength of Ga/Na-ZSM-5(28) and Ga/Na-SSZ-39(9) catalysts

| Zeolites     | weak acid | moderate strong acid | strong acid |
|--------------|-----------|----------------------|-------------|
| Ga/ZSM-5(28) | 263213    | 537195               | 340579      |
| Ga/SSZ-39(9) | 228061    | 593547               | 257701      |

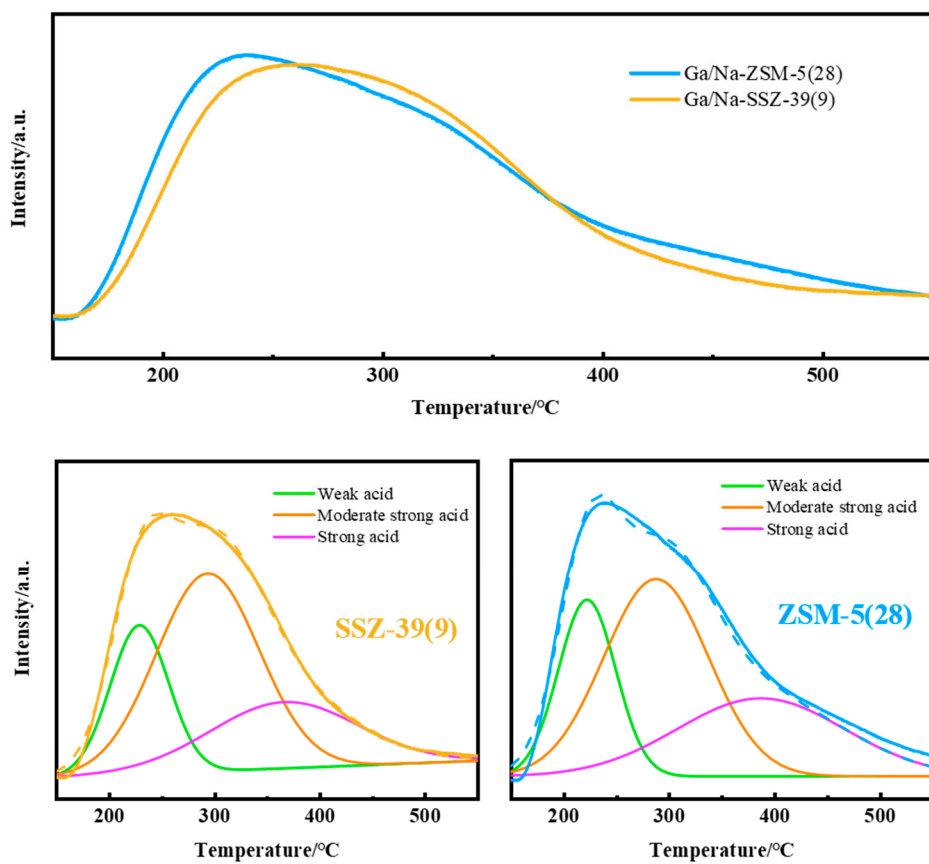

**Figure S4.** NH<sub>3</sub>-TPD profiles of the Ga/Na-ZSM-5(28) and Ga/Na-SSZ-39(9) catalysts

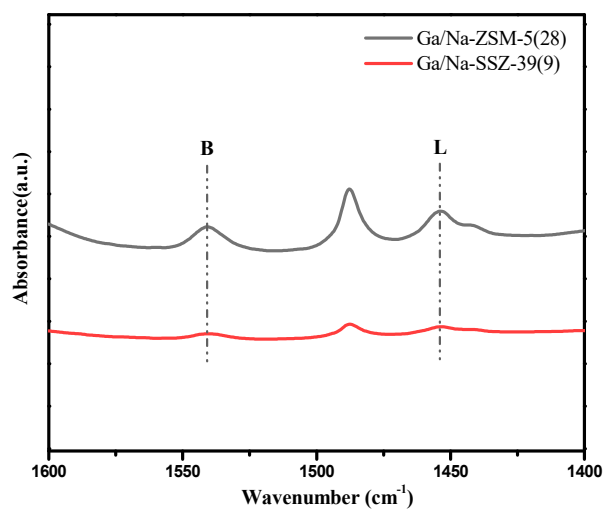

**Figure S5.** Py-FTIR spectra of the Ga/Na-ZSM-5(28) and Ga/Na-SSZ-39(9) catalysts thermal treated at 300 °C

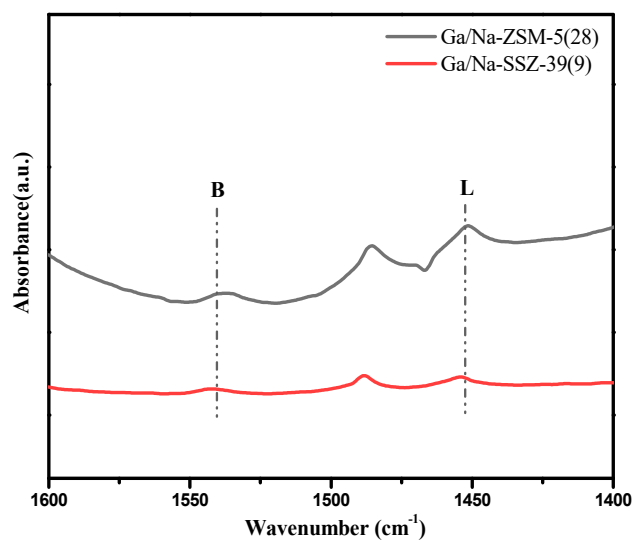

**Figure S6.** Py-FTIR spectra of the Ga/Na-ZSM-5(28) and Ga/Na-SSZ-39(9) catalysts thermal treated at 450 °C

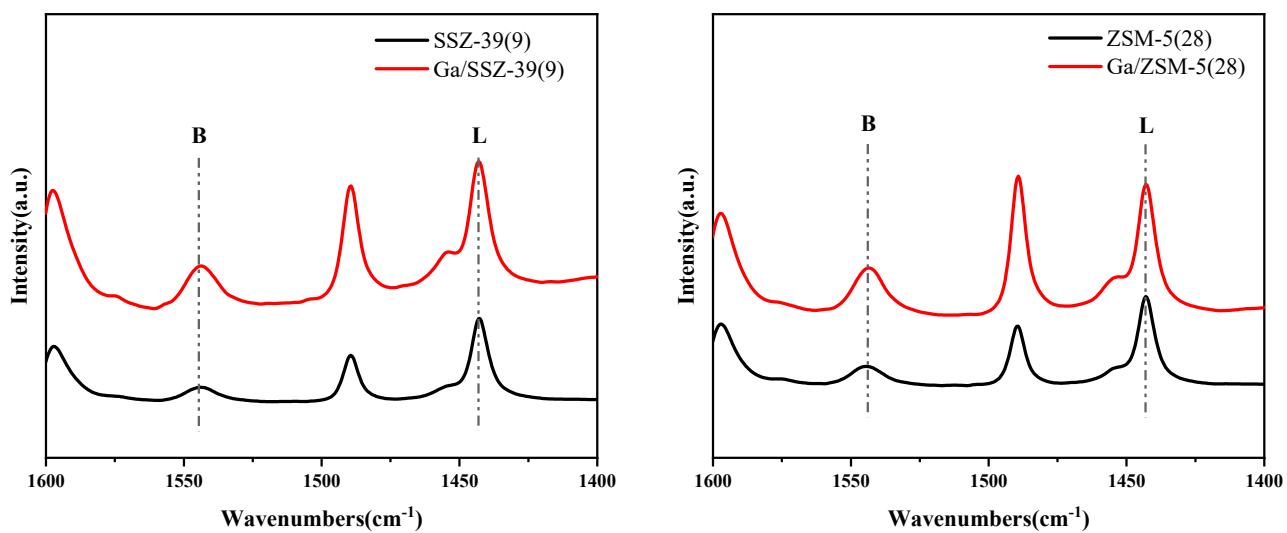

**Figure S7.** Py-FTIR spectra of the Ga/ZSM-5 (28), Ga/Na-SSZ-39(9) samples and their pristine materials.
